# Supplementary material for: Fast decoding cell type–specific transcription factor binding landscape at single-nucleotide resolution
Source: HighWire-hosted journal article supplement (doi:10.1101/gr.269613.120), 2021-03-19
Supplement: Supplemental_Tables_JDedit.xlsx [file Supplemental_Tables_JDedit.xlsx]

## Sheet: Table_S1
Supplemental Table S1. The dimensions and kernel sizes of each layer in Leopard architecture. Each row describes the information of a layer in our neural network model. Each layer has two dimensions, where the first dimension is the length along the genomic coordinate and the second dimension is the channel.
name	dimension	kernel size
input	10240 × 6	-
convolution	10240 × 15	7
convolution	10240 × 15	7
max pooling	5120 × 15	2
convolution	5120 × 22	7
convolution	5120 × 22	7
max pooling	2560 × 22	2
convolution	2560 × 33	7
convolution	2560 × 33	7
max pooling	1280 × 33	2
convolution	1280 × 49	7
convolution	1280 × 49	7
max pooling	640 × 49	2
convolution	640 × 73	7
convolution	640 × 73	7
max pooling	320 × 73	2
convolution	320 × 109	7
convolution	320 × 109	7
upscaling	640 × 72	2
concatenation	640 × 145	-
convolution	640 × 72	7
convolution	640 × 72	7
upscaling	1280 × 48	2
concatenation	1280 × 97	-
convolution	1280 × 48	7
convolution	1280 × 48	7
upscaling	2560 × 32	2
concatenation	2560 × 65	-
convolution	2560 × 32	7
convolution	2560 × 32	7
upscaling	5120 × 21	2
concatenation	5120 × 43	-
convolution	5120 × 21	7
convolution	5120 × 21	7
upscaling	10240 × 14	2
concatenation	10240 × 29	-
convolution	10240 × 14	7
convolution	10240 × 14	7
convolution/output	10240 × 1	7

## Sheet: Table_S2
Supplemental Table S2. The training and testing partition of 51 ChIP-seq data used in this study. Each row describes a TF and each column describes a cell type. The training and testing data are shown in blue and red, respectively.
	A549	GM12878	H1-hESC	HCT116	HeLa-S3	HepG2	iPSC	IMR-90	K562	liver	MCF-7	PANC-1	PC-3	training cell types	testing cell types
CTCF	Train	Test	Train	Test		Train	Test	Train	Train		Train		Test	A549; H1-hESC; HepG2; IMR-90; K562; MCF-7	GM12878; HCT116; iPSC; PC-3
EGR1		Train	Train						Test	Test				GM12878; H1-hESC	K562; liver
FOXA1						Train				Test	Test			HepG2	liver; MCF-7
FOXA2						Train				Test				HepG2	liver
GABPA		Train	Train		Train	Train			Test	Test				GM12878; H1-hESC; HeLa-S3; HepG2	K562; liver
HNF4A						Train				Test				HepG2	liver
JUND		Test	Test	Train		Train			Train	Test	Train			HCT116; HepG2; K562; MCF-7	GM12878; H1-hESC; liver
NANOG			Train				Test							H1-hESC	iPSC
REST	Test	Test	Train		Train	Train			Test	Test		Train		H1-hESC; HeLa-S3; HepG2; PANC-1	A549; GM12878; K562; liver
TAF1	Test	Train	Train		Train	Test			Train	Test				GM12878; H1-hESC; HeLa-S3; K562	A549; HepG2; liver

## Sheet: Table_S3
Supplemental Table S3. The AUPRC baselines of random predictions and the predictions by overlapping DNase-seq signals with FIMO motif scanning hits. For each pair, we calculated the baseline of random predictions, which were also the percentage of TF binding sites. We also calculated a more stringent baseline by overlapping DNase-seq signals with FIMO motif scanning hits.
pair	random prediction	FIMO + DNase-seq
CTCF_GM12878	0.000250214	0.0132
CTCF_HCT116	0.00019463	0.0293
CTCF_iPSC	0.000372624	0.0392
CTCF_PC-3	0.000279593	0.0179
EGR1_K562	0.000272116	0.023
EGR1_liver	0.000112001	0.0155
FOXA1_liver	0.000129115	0.023
FOXA1_MCF-7	0.000226712	0.0151
FOXA2_liver	0.000142837	0.0217
GABPA_K562	0.000109502	0.0164
GABPA_liver	0.000122293	0.022
HNF4A_liver	0.000372419	0.0214
JUND_GM12878	6.07805e-05	0.0158
JUND_H1-hESC	0.000132903	0.0097
JUND_liver	0.000119938	0.0128
NANOG_iPSC	9.50006e-05	0.0086
REST_A549	5.73483e-05	0.0029
REST_GM12878	3.7463e-05	0.0019
REST_K562	0.000133374	0.007
REST_liver	0.000145056	0.0081
TAF1_A549	4.09064e-05	0.0047
TAF1_HepG2	0.000118483	0.0064
TAF1_liver	6.41811e-05	0.0072
average	0.000156065	0.0149043

## Sheet: Table_S4
Supplemental Table S4. The partial AUPRCs and other metrics at different recall cutoffs for Leopard predictions of the ChIP-seq peaks. To fully understand the performance of Leopard predictions on ChIP-seq data, we calculated the partial AUPRCs and related metrics using different recall cutoffs at 0.01, 0.05, 0.10, 0.50, 0.80 and 0.90.
pair	recall-cutoff	AUPRC at cutoff	Positive	TP	FP	FN	precision=TP/(TP+FP)	FPR=FP/(FP+TN)
CTCF_GM12878	0.01	0.00974	111031	1110	27	109921	0.97625	0
	0.05	0.04858	111031	5552	207	105479	0.96406	0
	0.1	0.09599	111031	11103	1094	99928	0.91031	0
	0.5	0.34491	111031	55514	57349	55517	0.49187	0.00013
	0.8	0.43016	111031	88829	783311	22202	0.10185	0.00177
	0.9	0.43668	111031	99926	2752708	11105	0.03503	0.0062
CTCF_HCT116	0.01	0.00984	86366	863	8	85503	0.99082	0
	0.05	0.04889	86366	4319	146	82047	0.9673	0
	0.1	0.09699	86366	8637	412	77729	0.95447	0
	0.5	0.4453	86366	43183	15887	43183	0.73105	4e-05
	0.8	0.58725	86366	69093	265967	17273	0.20621	0.0006
	0.9	0.60005	86366	77733	1164058	8633	0.0626	0.00262
CTCF_iPSC	0.01	0.00748	165350	1653	592	163697	0.7363	0
	0.05	0.03733	165350	8268	2692	157082	0.75438	1e-05
	0.1	0.07484	165350	16536	5393	148814	0.75407	1e-05
	0.5	0.33514	165350	82675	110161	82675	0.42873	0.00025
	0.8	0.41206	165350	132284	1067323	33066	0.11027	0.00241
	0.9	0.41971	165350	148814	3080199	16536	0.04609	0.00694
CTCF_PC-3	0.01	0.00912	124068	1241	161	122827	0.88516	0
	0.05	0.04322	124068	6203	1317	117865	0.82487	0
	0.1	0.0831	124068	12407	3604	111661	0.7749	1e-05
	0.5	0.2783	124068	62034	105798	62034	0.36962	0.00024
	0.8	0.33937	124068	99253	1398992	24815	0.06625	0.00315
	0.9	0.34334	124068	111684	5825112	12384	0.01881	0.01313
EGR1_K562	0.01	0.00926	120750	1208	140	119542	0.89614	0
	0.05	0.04415	120750	6038	1131	114712	0.84224	0
	0.1	0.08499	120750	12076	3093	108674	0.7961	1e-05
	0.5	0.32438	120750	60376	93229	60374	0.39306	0.00021
	0.8	0.39917	120750	96602	741894	24148	0.11521	0.00167
	0.9	0.40748	120750	108682	1939706	12068	0.05306	0.00437
EGR1_liver	0.01	0.00907	49700	497	71	49203	0.875	0
	0.05	0.04019	49700	2485	1177	47215	0.67859	0
	0.1	0.07051	49700	4970	4440	44730	0.52816	1e-05
	0.5	0.15587	49700	24848	400032	24852	0.05848	0.0009
	0.8	0.16685	49700	39767	1876507	9933	0.02075	0.00423
	0.9	0.16845	49700	44731	4068928	4969	0.01087	0.00917
FOXA1_liver	0.01	0.00856	57294	573	131	56721	0.81392	0
	0.05	0.03791	57294	2865	1349	54429	0.67988	0
	0.1	0.06999	57294	5729	3755	51565	0.60407	1e-05
	0.5	0.18189	57294	28646	399281	28648	0.06694	0.0009
	0.8	0.19175	57294	45827	3713037	11467	0.01219	0.00837
	0.9	0.19256	57294	51509	11839797	5785	0.00433	0.02669
FOXA1_MCF-7	0.01	0.00898	100602	1006	169	99596	0.85617	0
	0.05	0.04064	100602	5030	1829	95572	0.73334	0
	0.1	0.075	100602	10060	5754	90542	0.63615	1e-05
	0.5	0.2088	100602	50304	546601	50298	0.08427	0.00123
	0.8	0.21887	100602	80480	8050108	20122	0.0099	0.01815
	0.9	0.21954	100602	91298	23637424	9304	0.00385	0.05328
FOXA2_liver	0.01	0.00845	57294	573	149	56721	0.79363	0
	0.05	0.03792	57294	2865	1347	54429	0.6802	0
	0.1	0.06916	57294	5729	4183	51565	0.57799	1e-05
	0.5	0.17323	57294	28647	412054	28647	0.065	0.00093
	0.8	0.18287	57294	45837	3710947	11457	0.0122	0.00836
	0.9	0.18367	57294	51548	12531275	5746	0.0041	0.02824
GABPA_K562	0.01	0.00823	48591	486	119	48105	0.80331	0
	0.05	0.03892	48591	2430	870	46161	0.73636	0
	0.1	0.07366	48591	4859	2493	43732	0.66091	1e-05
	0.5	0.17917	48591	24298	457915	24293	0.05039	0.00103
	0.8	0.18799	48591	38868	2546070	9723	0.01504	0.00574
	0.9	0.18908	48591	43723	6081417	4868	0.00714	0.01371
GABPA_liver	0.01	0.00517	54267	543	540	53724	0.50139	0
	0.05	0.02438	54267	2713	3223	51554	0.45704	1e-05
	0.1	0.04408	54267	5427	12878	48840	0.29648	3e-05
	0.5	0.10162	54267	27136	497948	27131	0.05168	0.00112
	0.8	0.11091	54267	43434	2890110	10833	0.01481	0.00651
	0.9	0.112	54267	48808	6947334	5459	0.00698	0.01566
HNF4A_liver	0.01	0.0086	165259	1653	255	163606	0.86635	0
	0.05	0.04134	165259	8263	2612	156996	0.75982	1e-05
	0.1	0.07643	165259	16525	8894	148734	0.6501	2e-05
	0.5	0.20002	165259	82637	718470	82622	0.10315	0.00162
	0.8	0.21777	165259	132165	4750167	33094	0.02707	0.01071
	0.9	0.21967	165259	148853	12804538	16406	0.01149	0.02887
JUND_GM12878	0.01	0.00933	26971	270	27	26701	0.90909	0
	0.05	0.04209	26971	1349	485	25622	0.73555	0
	0.1	0.07389	26971	2697	2332	24274	0.53629	1e-05
	0.5	0.16558	26971	13486	175791	13485	0.07125	0.0004
	0.8	0.17498	26971	21584	2233832	5387	0.00957	0.00503
	0.9	0.17562	26971	24258	6876583	2713	0.00352	0.0155
JUND_H1-hESC	0.01	0.00949	58975	590	55	58385	0.91473	0
	0.05	0.04161	58975	2949	1367	56026	0.68327	0
	0.1	0.07107	58975	5898	5594	53077	0.51323	1e-05
	0.5	0.1482	58975	29487	687939	29488	0.0411	0.00155
	0.8	0.15505	58975	47163	4520722	11812	0.01032	0.01019
	0.9	0.15578	58975	53161	11883128	5814	0.00445	0.02678
JUND_liver	0.01	0.00986	53222	532	13	52690	0.97615	0
	0.05	0.04773	53222	2661	229	50561	0.92076	0
	0.1	0.0921	53222	5322	905	47900	0.85467	0
	0.5	0.26536	53222	26613	220375	26609	0.10775	0.0005
	0.8	0.28336	53222	42582	1409578	10640	0.02932	0.00318
	0.9	0.28554	53222	47895	3236048	5327	0.01458	0.00729
NANOG_iPSC	0.01	8e-05	42156	422	79326	41734	0.00529	0.00018
	0.05	0.00038	42156	2108	234463	40048	0.00891	0.00053
	0.1	0.00087	42156	4216	402408	37940	0.01037	0.00091
	0.5	0.00435	42156	21073	4008444	21083	0.00523	0.00903
	0.8	0.00528	42156	33798	26389712	8358	0.00128	0.05948
	0.9	0.00536	42156	37723	59643355	4433	0.00063	0.13442
REST_A549	0.01	0.00963	25448	254	11	25194	0.95849	0
	0.05	0.04615	25448	1272	261	24176	0.82975	0
	0.1	0.08132	25448	2545	1683	22903	0.60194	0
	0.5	0.16681	25448	12724	293101	12724	0.04161	0.00066
	0.8	0.17164	25448	20371	3880756	5077	0.00522	0.00875
	0.9	0.17201	25448	22888	9319143	2560	0.00245	0.021
REST_GM12878	0.01	0.00815	16624	166	43	16458	0.79426	0
	0.05	0.04012	16624	831	282	15793	0.74663	0
	0.1	0.07164	16624	1662	1385	14962	0.54545	0
	0.5	0.14848	16624	8312	309651	8312	0.02614	0.0007
	0.8	0.15171	16624	13300	4112063	3324	0.00322	0.00927
	0.9	0.15191	16624	14954	13312122	1670	0.00112	0.03
REST_K562	0.01	0.00862	59184	592	79	58592	0.88227	0
	0.05	0.04082	59184	2959	1236	56225	0.70536	0
	0.1	0.07124	59184	5918	5816	53266	0.50435	1e-05
	0.5	0.12987	59184	29597	1459605	29587	0.01987	0.00329
	0.8	0.13324	59184	47368	8315319	11816	0.00566	0.01874
	0.9	0.13367	59184	53269	17709084	5915	0.003	0.03991
REST_liver	0.01	0.00641	64368	644	358	63724	0.64271	0
	0.05	0.02482	64368	3218	6459	61150	0.33254	1e-05
	0.1	0.03628	64368	6437	34244	57931	0.15823	8e-05
	0.5	0.05315	64368	32203	2273619	32165	0.01397	0.00512
	0.8	0.05586	64368	51402	10966761	12966	0.00467	0.02472
	0.9	0.05621	64368	57729	24271465	6639	0.00237	0.0547
TAF1_A549	0.01	0.00742	18152	182	94	17970	0.65942	0
	0.05	0.02767	18152	908	1420	17244	0.39003	0
	0.1	0.04391	18152	1815	4759	16337	0.27609	1e-05
	0.5	0.08768	18152	9077	296055	9075	0.02975	0.00067
	0.8	0.0926	18152	14521	1726748	3631	0.00834	0.00389
	0.9	0.09327	18152	16336	3360967	1816	0.00484	0.00757
TAF1_HepG2	0.01	0.00262	52576	526	1726	52050	0.23357	0
	0.05	0.00903	52576	2629	19236	49947	0.12024	4e-05
	0.1	0.01386	52576	5259	60441	47317	0.08005	0.00014
	0.5	0.02865	52576	26282	1465819	26294	0.01761	0.0033
	0.8	0.03153	52576	42157	15527497	10419	0.00271	0.035
	0.9	0.0317	52576	47217	47135053	5359	0.001	0.10623
TAF1_liver	0.01	0.00148	28480	285	1680	28195	0.14504	0
	0.05	0.00622	28480	1425	13336	27055	0.09654	3e-05
	0.1	0.0104	28480	2848	36422	25632	0.07252	8e-05
	0.5	0.02456	28480	14236	800307	14244	0.01748	0.0018
	0.8	0.0279	28480	22783	3854999	5697	0.00588	0.00869
	0.9	0.02833	28480	25657	9180604	2823	0.00279	0.02069

## Sheet: Table_S5
Supplemental Table S5. The partial AUROCs and other metrics at different FPR cutoffs for Leopard predictions of the ChIP-seq peaks. To fully understand the performance of Leopard predictions on ChIP-seq data, we calculated the partial AUROCs and related metrics using different FPR cutoffs at 0.0001, 0.001, 0.005, 0.01, 0.05 and 0.1.
pair	FPR-cutoff	AUROC at cutoff	Positive	TP	FP	FN	precision=TP/(TP+FP)	recall=TP/(TP+FN)
CTCF_GM12878	0.0001	3e-05	111031	50855	44363	60176	0.53409	0.45803
	0.001	0.00062	111031	82563	443691	28468	0.15689	0.7436
	0.005	0.00397	111031	98303	2218501	12728	0.04243	0.88537
	0.01	0.00852	111031	103120	4460339	7911	0.0226	0.92875
	0.05	0.04725	111031	109264	23320882	1767	0.00466	0.98409
	0.1	0.09669	111031	110360	55772561	671	0.00197	0.99396
CTCF_HCT116	0.0001	5e-05	86366	52873	44366	33493	0.54374	0.6122
	0.001	0.00075	86366	72539	443741	13827	0.1405	0.8399
	0.005	0.00434	86366	80443	2215569	5923	0.03504	0.93142
	0.01	0.00908	86366	82571	4437646	3795	0.01827	0.95606
	0.05	0.04783	86366	85349	21992947	1017	0.00387	0.98822
	0.1	0.09785	86366	85958	53201300	408	0.00161	0.99528
CTCF_iPSC	0.0001	3e-05	165350	61285	44358	104065	0.58011	0.37064
	0.001	0.00056	165350	114268	443582	51082	0.20484	0.69107
	0.005	0.0038	165350	144251	2216219	21099	0.06111	0.8724
	0.01	0.0083	165350	152977	4425726	12373	0.03341	0.92517
	0.05	0.04712	165350	163267	22745496	2083	0.00713	0.9874
	0.1	0.09675	165350	164800	48901173	550	0.00336	0.99667
CTCF_PC-3	0.0001	2e-05	124068	38810	44364	85258	0.46661	0.31281
	0.001	0.00055	124068	84838	443652	39230	0.16053	0.6838
	0.005	0.00369	124068	103892	2219860	20176	0.04471	0.83738
	0.01	0.00801	124068	109658	4440080	14410	0.0241	0.88385
	0.05	0.04427	124068	118890	21659545	5178	0.00546	0.95826
	0.1	0.08438	124068	121043	40030322	3025	0.00301	0.97562
EGR1_K562	0.0001	3e-05	120750	46159	44363	74591	0.50992	0.38227
	0.001	0.00059	120750	88788	443659	31962	0.16675	0.7353
	0.005	0.004	120750	109967	2217173	10783	0.04725	0.9107
	0.01	0.00869	120750	115221	4442107	5529	0.02528	0.95421
	0.05	0.04801	120750	119804	22504489	946	0.0053	0.99217
	0.1	0.09627	120750	120335	43705654	415	0.00275	0.99656
EGR1_liver	0.0001	2e-05	49700	12858	44371	36842	0.22468	0.25871
	0.001	0.0004	49700	25737	443749	23963	0.05482	0.51785
	0.005	0.00326	49700	41112	2219812	8588	0.01818	0.8272
	0.01	0.00763	49700	45093	4431019	4607	0.01007	0.9073
	0.05	0.04391	49700	48694	21208645	1006	0.00229	0.97976
	0.1	0.08373	49700	49064	39162742	636	0.00125	0.9872
FOXA1_liver	0.0001	2e-05	57294	16460	44368	40834	0.2706	0.28729
	0.001	0.00041	57294	29330	443685	27964	0.06201	0.51192
	0.005	0.00302	57294	42107	2218814	15187	0.01862	0.73493
	0.01	0.00693	57294	47001	4438909	10293	0.01048	0.82035
	0.05	0.0391	57294	52930	20409393	4364	0.00259	0.92383
	0.1	0.06245	57294	53937	31509256	3357	0.00171	0.94141
FOXA1_MCF-7	0.0001	2e-05	100602	26884	44365	73718	0.37732	0.26723
	0.001	0.00039	100602	48416	443634	52186	0.0984	0.48126
	0.005	0.00272	100602	64792	2218597	35810	0.02838	0.64404
	0.01	0.00616	100602	73074	4433928	27528	0.01621	0.72637
	0.05	0.03989	100602	91298	23637424	9304	0.00385	0.90752
	0.1	0.08625	100602	95697	45727490	4905	0.00209	0.95124
FOXA2_liver	0.0001	2e-05	57294	15727	44368	41567	0.2617	0.2745
	0.001	0.0004	57294	29122	443635	28172	0.0616	0.50829
	0.005	0.003	57294	42071	2219050	15223	0.01861	0.7343
	0.01	0.0069	57294	46895	4425412	10399	0.01049	0.8185
	0.05	0.0427	57294	53114	23500487	4180	0.00226	0.92704
	0.1	0.08977	57294	54841	54153905	2453	0.00101	0.95719
GABPA_K562	0.0001	2e-05	48591	13674	44368	34917	0.23559	0.28141
	0.001	0.0004	48591	24085	443638	24506	0.05149	0.49567
	0.005	0.00309	48591	37936	2220726	10655	0.0168	0.78072
	0.01	0.00723	48591	42181	4427427	6410	0.00944	0.86808
	0.05	0.04415	48591	47177	21803441	1414	0.00216	0.9709
	0.1	0.08595	48591	47877	40735875	714	0.00117	0.98531
GABPA_liver	0.0001	1e-05	54267	11099	44368	43168	0.2001	0.20453
	0.001	0.00036	54267	26137	443761	28130	0.05562	0.48164
	0.005	0.003	54267	41299	2220282	12968	0.01826	0.76103
	0.01	0.00705	54267	46382	4419728	7885	0.01039	0.8547
	0.05	0.04443	54267	52494	23271936	1773	0.00225	0.96733
	0.1	0.0789	54267	53264	37871403	1003	0.0014	0.98152
HNF4A_liver	0.0001	1e-05	165259	34350	44358	130909	0.43642	0.20786
	0.001	0.00033	165259	71203	443702	94056	0.13828	0.43086
	0.005	0.00267	165259	113190	2215550	52069	0.04861	0.68492
	0.01	0.0064	165259	130678	4436461	34581	0.02861	0.79075
	0.05	0.03958	165259	154399	20982654	10860	0.0073	0.93428
	0.1	0.06875	165259	158535	34631509	6724	0.00456	0.95931
JUND_GM12878	0.0001	2e-05	26971	9432	44372	17539	0.1753	0.34971
	0.001	0.00049	26971	16439	443523	10532	0.03574	0.60951
	0.005	0.00341	26971	21553	2217562	5418	0.00963	0.79912
	0.01	0.00761	26971	23483	4447640	3488	0.00525	0.87068
	0.05	0.03879	26971	25503	19448294	1468	0.00131	0.94557
	0.1	0.07707	26971	25943	37256500	1028	0.0007	0.96188
JUND_H1-hESC	0.0001	2e-05	58975	13952	44365	45023	0.23924	0.23657
	0.001	0.00034	58975	25905	443585	33070	0.05518	0.43925
	0.005	0.00271	58975	40761	2214549	18214	0.01807	0.69116
	0.01	0.00647	58975	47054	4464086	11921	0.01043	0.79786
	0.05	0.0424	58975	55575	23484057	3400	0.00236	0.94235
	0.1	0.09013	58975	57179	46194657	1796	0.00124	0.96955
JUND_liver	0.0001	3e-05	53222	18266	44372	34956	0.29161	0.3432
	0.001	0.00048	53222	32112	443541	21110	0.06751	0.60336
	0.005	0.00357	53222	45738	2217537	7484	0.02021	0.85938
	0.01	0.00806	53222	49124	4445509	4098	0.01093	0.923
	0.05	0.04649	53222	52308	22069402	914	0.00236	0.98283
	0.1	0.09049	53222	52775	41827649	447	0.00126	0.9916
NANOG_iPSC	0.0001	0	42156	277	44370	41879	0.0062	0.00657
	0.001	5e-05	42156	4728	443681	37428	0.01054	0.11215
	0.005	0.00117	42156	16442	2219677	25714	0.00735	0.39003
	0.01	0.00347	42156	21880	4437211	20276	0.00491	0.51902
	0.05	0.03122	42156	32946	22365895	9210	0.00147	0.78153
	0.1	0.07256	42156	36361	44450756	5795	0.00082	0.86253
REST_A549	0.0001	2e-05	25448	7967	44374	17481	0.15221	0.31307
	0.001	0.00044	25448	13655	443998	11793	0.02984	0.53658
	0.005	0.00304	25448	18408	2220271	7040	0.00822	0.72336
	0.01	0.00689	25448	20821	4418696	4627	0.00469	0.81818
	0.05	0.04261	25448	24338	21737721	1110	0.00112	0.95638
	0.1	0.09223	25448	25049	47171997	399	0.00053	0.98432
REST_GM12878	0.0001	3e-05	16624	5521	44371	11103	0.11066	0.33211
	0.001	0.00044	16624	8938	443845	7686	0.01974	0.53766
	0.005	0.00306	16624	12050	2221460	4574	0.0054	0.72486
	0.01	0.00692	16624	13422	4453965	3202	0.003	0.80739
	0.05	0.04148	16624	15467	21667895	1157	0.00071	0.9304
	0.1	0.08496	16624	16017	41989863	607	0.00038	0.96349
REST_K562	0.0001	2e-05	59184	12293	44368	46891	0.21696	0.20771
	0.001	0.0003	59184	22155	443804	37029	0.04755	0.37434
	0.005	0.00223	59184	33383	2218675	25801	0.01482	0.56405
	0.01	0.00539	59184	40810	4448433	18374	0.00909	0.68954
	0.05	0.03929	59184	54588	22149768	4596	0.00246	0.92234
	0.1	0.08666	59184	57310	44266764	1874	0.00129	0.96834
REST_liver	0.0001	1e-05	64368	7041	44372	57327	0.13695	0.10939
	0.001	0.00019	64368	16560	443536	47808	0.03599	0.25727
	0.005	0.00176	64368	31897	2219559	32471	0.01417	0.49554
	0.01	0.00465	64368	41472	4453197	22896	0.00923	0.6443
	0.05	0.03587	64368	57042	21595817	7326	0.00263	0.88619
	0.1	0.08318	64368	61210	47282153	3158	0.00129	0.95094
TAF1_A549	0.0001	2e-05	18152	5040	44371	13112	0.102	0.27766
	0.001	0.00043	18152	10199	443801	7953	0.02246	0.56187
	0.005	0.00337	18152	15338	2216961	2814	0.00687	0.84498
	0.01	0.00782	18152	16828	4420395	1324	0.00379	0.92706
	0.05	0.04463	18152	17714	21336518	438	0.00083	0.97587
	0.1	0.09557	18152	17904	53793938	248	0.00033	0.98634
TAF1_HepG2	0.0001	1e-05	52576	4377	44377	48199	0.08978	0.08325
	0.001	0.00019	52576	15261	443810	37315	0.03324	0.29027
	0.005	0.00205	52576	30190	2216903	22386	0.01344	0.57422
	0.01	0.00523	52576	35693	4445524	16883	0.00797	0.67888
	0.05	0.03643	52576	43981	23139048	8595	0.0019	0.83652
	0.1	0.07979	52576	47217	47135053	5359	0.001	0.89807
TAF1_liver	0.0001	1e-05	28480	3229	44378	25251	0.06783	0.11338
	0.001	0.00025	28480	11003	443865	17477	0.02419	0.38634
	0.005	0.00259	28480	20046	2223188	8434	0.00894	0.70386
	0.01	0.00645	28480	23340	4436410	5140	0.00523	0.81952
	0.05	0.03882	28480	27052	20171967	1428	0.00134	0.94986
	0.1	0.07691	28480	27616	37759437	864	0.00073	0.96966

## Sheet: Table_S6
Supplemental Table S6. The partial AUPRCs and other metrics at different recall cutoffs for Leopard predictions of the ChIP-exo peaks. To fully understand the performance of Leopard predictions on ChIP-exo data, we calculated the partial AUPRCs and related metrics using different recall cutoffs at 0.01, 0.05, 0.10, 0.50, 0.80 and 0.90.
pair	recall-cutoff	AUPRC at cutoff	Positive	TP	FP	FN	precision=TP/(TP+FP)	FPR=FP/(FP+TN)
NR2F2_MCF-7	0.01	0.00965	1160788	11605	530	1149183	0.95633	0
	0.05	0.04672	1160788	58034	6583	1102754	0.89813	1e-05
	0.1	0.09042	1160789	116081	20635	1044708	0.84907	5e-05
	0.5	0.35623	1160789	580395	626618	580394	0.48085	0.00142
	0.8	0.45582	1160789	928638	4215997	232151	0.18051	0.00953
	0.9	0.46865	1160789	1044717	12918125	116072	0.07482	0.02919
CTCF_HeLa-S3	0.01	0.00879	312045	3121	568	308924	0.84603	0
	0.05	0.04024	312045	15602	4878	296443	0.7618	1e-05
	0.1	0.0778	312045	31202	10843	280843	0.74212	2e-05
	0.5	0.34625	312045	156021	120442	156024	0.56435	0.00027
	0.8	0.47162	312045	249637	699053	62408	0.26314	0.00158
	0.9	0.49254	312045	280837	1551884	31208	0.15324	0.0035
ER_MCF-7	0.01	0.00895	1413625	14132	2074	1399493	0.872	0
	0.05	0.04476	1413626	70682	8580	1342944	0.89175	2e-05
	0.1	0.08871	1413625	141364	21771	1272261	0.86655	5e-05
	0.5	0.36127	1413626	706814	762897	706812	0.48092	0.00172
	0.8	0.46068	1413625	1130918	4983909	282707	0.18495	0.01127
	0.9	0.47441	1413625	1272277	13009121	141348	0.08909	0.02941
GR_IMR-90	0.01	0.0081	70102	701	211	69401	0.76864	0
	0.05	0.03543	70102	3505	2517	66597	0.58203	1e-05
	0.1	0.0604	70102	7011	9349	63091	0.42855	2e-05
	0.5	0.13674	70102	35055	472342	35047	0.06909	0.00106
	0.8	0.14867	70102	56089	3040199	14013	0.01811	0.00685
	0.9	0.14998	70102	63093	7541865	7009	0.0083	0.017
GR_K562	0.01	0.00452	32359	324	375	32035	0.46352	0
	0.05	0.02267	32359	1618	2129	30741	0.43181	0
	0.1	0.04268	32359	3236	5370	29123	0.37602	1e-05
	0.5	0.13243	32359	16180	141101	16179	0.10287	0.00032
	0.8	0.14927	32359	25889	967582	6470	0.02606	0.00218
	0.9	0.15124	32359	29125	2117434	3234	0.01357	0.00477
EP300_MCF-7	0.01	0.00838	548248	5483	834	542765	0.86797	0
	0.05	0.0412	548248	27414	7802	520834	0.77846	2e-05
	0.1	0.07825	548248	54825	23221	493423	0.70247	5e-05
	0.5	0.27728	548248	274119	632788	274129	0.30226	0.00143
	0.8	0.3331	548248	438590	5221461	109658	0.07749	0.01178
	0.9	0.33765	548248	493368	24429915	54880	0.0198	0.05512

## Sheet: Table_S7
Supplemental Table S7. The partial AUROCs and other metrics at different FPR cutoffs for Leopard predictions of the ChIP-exo peaks. To fully understand the performance of Leopard predictions on ChIP-exo data, we calculated the partial AUROCs and related metrics using different FPR cutoffs at 0.0001, 0.001, 0.005, 0.01, 0.05 and 0.1.
pair	FPR-cutoff	AUROC at cutoff	Positive	TP	FP	FN	precision=TP/(TP+FP)	recall=TP/(TP+FN)
NR2F2_MCF-7	0.0001	1e-05	1160788	175538	44258	985250	0.79864	0.15122
	0.001	0.00031	1160788	513066	442578	647722	0.53688	0.442
	0.005	0.00276	1160789	826299	2212812	334490	0.27189	0.71184
	0.01	0.00659	1160789	935566	4425747	225223	0.1745	0.80597
	0.05	0.04226	1160789	1075147	22146932	85642	0.0463	0.92622
	0.1	0.08901	1160789	1103083	44140472	57706	0.02438	0.95029
CTCF_HeLa-S3	0.0001	2e-05	312045	93801	44343	218244	0.67901	0.3006
	0.001	0.00055	312045	226608	443425	85437	0.3382	0.7262
	0.005	0.00402	312045	290078	2216640	21967	0.11572	0.9296
	0.01	0.00878	312045	301128	4435002	10917	0.06358	0.96501
	0.05	0.04823	312045	310483	22138815	1562	0.01383	0.995
	0.1	0.09583	312045	311213	43322088	832	0.00713	0.99733
ER_MCF-7	0.0001	1e-05	1413626	213704	44235	1199922	0.82851	0.15117
	0.001	0.00029	1413625	584312	442317	829313	0.56916	0.41334
	0.005	0.00261	1413625	958774	2211734	454851	0.3024	0.67824
	0.01	0.0063	1413625	1107892	4423207	305733	0.2003	0.78372
	0.05	0.04187	1413625	1319888	22110186	93737	0.05633	0.93369
	0.1	0.08938	1413625	1358223	44327659	55402	0.02973	0.96081
GR_IMR-90	0.0001	1e-05	70102	14827	44368	55275	0.25048	0.21151
	0.001	0.00036	70102	34321	443591	35781	0.07181	0.48959
	0.005	0.00299	70102	52900	2216565	17202	0.02331	0.75461
	0.01	0.00704	70102	59561	4441093	10541	0.01323	0.84963
	0.05	0.04365	70102	67062	21964226	3040	0.00304	0.95663
	0.1	0.08792	70102	68520	42246287	1582	0.00162	0.97743
GR_K562	0.0001	2e-05	32359	10611	44367	21748	0.193	0.32791
	0.001	0.00053	32359	21703	443830	10656	0.04662	0.67069
	0.005	0.00384	32359	29249	2216337	3110	0.01303	0.90389
	0.01	0.00849	32359	30719	4435141	1640	0.00688	0.94932
	0.05	0.04444	32359	31744	20833145	615	0.00152	0.98099
	0.1	0.06394	32359	31831	29641773	528	0.00107	0.98368
EP300_MCF-7	0.0001	1e-05	548248	82475	44319	465773	0.65046	0.15043
	0.001	0.00031	548248	241756	443211	306492	0.35295	0.44096
	0.005	0.00274	548248	384098	2216069	164150	0.14772	0.70059
	0.01	0.00649	548248	430423	4431325	117825	0.08853	0.78509
	0.05	0.04082	548248	491012	22141105	57236	0.0217	0.8956
	0.1	0.08649	548248	508151	44590027	40097	0.01127	0.92686

## Sheet: Table_S8
Supplemental Table S8. The training and testing partition of 56 ChIP-seq data used in the ENCODE-DREAM Challenge. We summarized the training - testing partition of ChIP-seq data in the ENCODE-DREAM Challenge. The training and testing data are shown in blue and red, respectively.
	A549	GM12878	H1-hESC	HCT116	HeLa-S3	HepG2	iPSC	IMR-90	K562	liver	MCF-7	PANC-1	PC-3	training cell types	testing cell types
CTCF	Train		Train		Train	Train	Test	Train	Train		Train		Test	A549; H1-hESC; HeLa-S3; HepG2; IMR-90; K562; MCF-7	iPSC; PC-3
E2F1		Train			Train				Test					GM12878; HeLa-S3	K562
EGR1		Train	Train	Train						Test	Train			GM12878; H1-hESC; HCT116; MCF-7	liver
FOXA1						Train				Test				HepG2	liver
FOXA2						Train				Test				HepG2	liver
GABPA		Train	Train		Train	Train				Test	Train			GM12878; H1-hESC; HeLa-S3; HepG2; MCF-7	liver
HNF4A						Train				Test				HepG2	liver
JUND				Train	Train	Train			Train	Test	Train			HCT116; HeLa-S3; HepG2; K562; MCF-7	liver
MAX	Train	Train	Train	Train	Train	Train			Train	Test				A549; GM12878; H1-hESC; HCT116; HeLa-S3; HepG2; K562	liver
NANOG			Train				Test							H1-hESC	iPSC
REST			Train		Train	Train				Test	Train	Train		H1-hESC; HeLa-S3; HepG2; MCF-7; PANC-1	liver
TAF1		Train	Train		Train				Train	Test				GM12878; H1-hESC; HeLa-S3; K562	liver

## Sheet: Table_S9
Supplemental Table S9. The accession numbers of sequence alignments of ChIP-seq reads downloaded from the ENCODE Project. We listed the accession numbers of ChIP-seq data from the ENCODE Project dataportal. We downloaded the sequence alignment files based on these accession numbers.
pair	accession num
CTCF_A549	ENCSR000DYD
CTCF_GM12878	ENCSR000DZN
CTCF_H1-hESC	ENCSR000BNH
CTCF_HCT116	ENCSR000BSE
CTCF_HepG2	ENCSR000BIE
CTCF_iPSC	ENCSR932ZMX
CTCF_IMR-90	ENCSR000EFI
CTCF_K562	ENCSR000BPJ
CTCF_MCF-7	ENCSR000AHD
CTCF_PC-3	ENCSR359LOD
EGR1_GM12878	ENCSR000BMQ
EGR1_H1-hESC	ENCSR000BJA
EGR1_K562	ENCSR000BNE
EGR1_liver	ENCSR736BUG
FOXA1_HepG2	ENCSR000BMO
FOXA1_liver	ENCSR735KEY
FOXA1_MCF-7	ENCSR126YEB
FOXA2_HepG2	ENCSR066EBK
FOXA2_liver	ENCSR310NYI
GABPA_GM12878	ENCSR331HPA
GABPA_H1-hESC	ENCSR000BIW
GABPA_HeLa-S3	ENCSR000BHS
GABPA_HepG2	ENCSR000BJK
GABPA_K562	ENCSR000BLO
GABPA_liver	ENCSR038GMB
HNF4A_HepG2	ENCSR000BLF
HNF4A_liver	ENCSR601OGE
JUND_GM12878	ENCSR000DYS
JUND_H1-hESC	ENCSR000BKP
JUND_HCT116	ENCSR000BSA
JUND_HepG2	ENCSR000BGK
JUND_K562	ENCSR000EGN
JUND_liver	ENCSR837GTK
JUND_MCF-7	ENCSR000BSU
NANOG_H1-hESC	ENCSR000BMT
NANOG_iPSC	ENCSR061DGF
REST_A549	ENCSR000BQP
REST_GM12878	ENCSR000BQS
REST_H1-hESC	ENCSR000BHM
REST_HeLa-S3	ENCSR000BMN
REST_HepG2	ENCSR000BJL
REST_K562	ENCSR000BMW
REST_liver	ENCSR867WPH
REST_PANC-1	ENCSR000BJO
TAF1_A549	ENCSR000BPF
TAF1_GM12878	ENCSR000BGS
TAF1_H1-hESC	ENCSR000BHO
TAF1_HeLa-S3	ENCSR000BHT
TAF1_HepG2	ENCSR000BJN
TAF1_K562	ENCSR000BKS
TAF1_liver	ENCSR062QVQ
